# Supplementary material
Source: Elsevier journal article supplement (https://www.sciencedirect.com/science/article/pii/S1887836921000545)
Supplement: mmc2 [file S1887836921000545:mmc2.docx]

**Anexo 2 del material adicional**

**Estrategia de búsqueda (última actualización, 20 de julio de 2021)**

| **PubMed** |
| --- |
| ("Acupuncture"[Mesh] OR "Acupuncture Therapy"[Mesh] OR "Acupuncture Points"[Mesh]) AND ("Neoplasms"[Mesh] OR "Neoplasms/therapeutic use"[Mesh] OR "Neoplasms/therapy"[Mesh) AND ("Fatigue"[Mesh] OR "Fatigue Syndrome, Chronic"[Mesh]) |
| **Scopus** |
| (TITLE-ABS-KEY [acupuncture] OR ALL [acupuncture] AND TITLE-ABS-KEY [cancer] OR ALL [cancer] OR TITLE-ABS-KEY [neoplasms] AND TITLE-ABS-KEY [fatigue] OR ALL [fatigue] AND TITLE-ABS-KEY [fatigue AND syndrome, AND chronic] OR TITLE-ABS-KEY [fatigue AND syndrome]) |
